# Supplementary material for: The effect of different Brønsted acids on the hydrothermal conversion of fructose to HMF
Source: Royal Society of Chemistry journal article supplement (doi:10.1039/c8gc00435h), 2018-01-01
Supplement: c8gc00435h1.pdf [file c8gc00435h1.pdf]

## Supplementary information to “Effect of different Brønsted acids on the hydrothermal conversion of fructose to HMF”

### Computational determination of the proton concentration at elevated temperature

In order to determine the  $pK_a$  at 140°C ( $pK_{a140^\circ C}$ ), we used the model developed by Helgeson<sup>34</sup>, in which the  $pK_a$  is calculated from the free energy of dissociation. Helgeson also provides a set of parameters for different acids. The selection that is used here is listed in Table 1. Where no data was available,  $pK_{a25^\circ C}$  was taken from literature and  $pK_{a140^\circ C}$  was estimated by assuming that  $pK_a$  values that are similar at 25°C would also be similar at 140°C.

$$pK_a(T) = \frac{\Delta S_e^\circ(T_r)}{2.303RT} \left[ T_r - T - \frac{\theta}{\omega} \left( 1 - \exp \left[ \exp(b + aT) - c + \frac{(T - T_r)}{\theta} \right] \right) \right] - \frac{\Delta H_r^\circ(T_r)}{2.303RT} + \frac{\Delta S_r^\circ(T_r)}{2.303R} + \frac{\alpha}{2.303R} \left( \ln \frac{T}{T_r} - 1 + \frac{T}{T_r} \right) + \frac{\beta(T - T_r)^2}{4.606RT}$$

Table 1: Parameters for the calculation of  $pK_a$  values at 140°C as provided by Helgeson<sup>34</sup>.

| Parameter                                        | Symbol                           | $pK_{a1}$<br>(H <sub>2</sub> O) | $pK_{a1}$<br>(H <sub>3</sub> PO <sub>4</sub> ) | $pK_a$<br>(HNO <sub>3</sub> ) | $pK_{a2}$<br>(H <sub>2</sub> SO <sub>4</sub> ) | $pK_a$<br>(AcOH) | $pK_a$ (HCl) |
|--------------------------------------------------|----------------------------------|---------------------------------|------------------------------------------------|-------------------------------|------------------------------------------------|------------------|--------------|
| Reference temperature                            | $T_r$ (K)                        | 298.15                          |                                                |                               |                                                |                  |              |
| Temperature                                      | $T$ (K)                          | 413.15                          |                                                |                               |                                                |                  |              |
| Gas constant                                     | $R$ (cal/molK)                   | 1.987                           |                                                |                               |                                                |                  |              |
| Solvent-dependent constant                       | $a$                              | 0.01875                         |                                                |                               |                                                |                  |              |
| Solvent-dependent constant                       | $b$                              | -12.741                         |                                                |                               |                                                |                  |              |
| Solvent-dependent constant                       | $\theta$                         | 219                             |                                                |                               |                                                |                  |              |
| Solvent-dependent constant                       | $c$                              | 0.000784                        |                                                |                               |                                                |                  |              |
| Electrostatic contribution to $\Delta S_r^\circ$ | $\Delta S_e^\circ$<br>(cal/molK) | -13.4482                        | -60.1485                                       | 3.7356                        | -39.8978                                       | -3.9504          | -15.525      |
| Entropy of dissociation                          | $\Delta S_r^\circ$<br>(cal/molK) | -19.31                          | -16.0                                          | -7.2                          | -22.0                                          | -22.1            | -34,4        |
| Enthalpy of dissociation                         | $\Delta H_r^\circ$<br>(cal/mol)  | 13,335                          | -1,840                                         | -4,100                        | -3,850                                         | -112             | -18,630      |
| Reaction-dependent coefficient                   | $\alpha$                         | -135.070                        | -300.614                                       | 10.434                        | -424.825                                       | -30.199          | -685.62      |
| Reaction-dependent coefficient                   | $\beta$                          | 3,479.41                        | 11,613.89                                      | -1,875.98                     | 12,657.02                                      | -88.49           | 1.9054       |

From these  $pK_{a140^{\circ}C}$  values  $[H]_{140^{\circ}C}$  was calculated as

$$[H] = [H_2A^-]_c + 2[HA^{2-}]_c + 3[A^{3-}]_c$$

where  $[H_2A^-]$ ,  $[HA^{2-}]$  and  $[A^{3-}]$  are the concentrations of the different rest ions. The index c is attributed to

the necessity of corrections, which are:  $[H_2A^-]_c = [H_2A^-] - [HA^{2-}]$

$$[HA^{2-}]_c = [HA^{2-}] - [A^{3-}]$$

$$[A^{3-}]_c = [A^{3-}]$$

$$[H_2A^-] = -\frac{K_{a1}}{2} + \sqrt{\frac{K_{a1}^2}{4} + K_{a1}c_0 + K_W}$$

$$[HA^{2-}] = \frac{K_{a2}}{2} + \sqrt{\frac{K_{a2}^2}{4} + K_{a2}[H_2A^-] + K_W}$$

$$[A^{3-}] = -\frac{K_{a3}}{2} + \sqrt{\frac{K_{a3}^2}{4} + K_{a3}[HA^{2-}] + K_W}$$

$c_0$  is the initial concentration of the acid and  $K_W$  is the dissociation constant of water.

If necessary,  $K_{a3}$  and  $K_{a2}$  were zero in the case that the acid was not triprotic.

$c_0$  was determined by the reverse calculation using  $[H]_{RT}$  and  $pK_{a25^{\circ}C}$  values which are known from the measurements and the literature, respectively.

## Experimental yields, conversion and selectivities

Table 2: Conversion of fructose (C(Frc)), yield of HMF and LA (Y(HMF/LA)) and selectivity, depending on reaction time and acid. <sup>n.d.</sup> not determined <sup>a</sup> 22 h

|                                          | Time (min): | 0   | 10   | 20  | 40   | 60   | 120  | 180  | 240  | 300  |
|------------------------------------------|-------------|-----|------|-----|------|------|------|------|------|------|
| H <sub>3</sub> PO <sub>4</sub><br>pH.1.0 | C(Frc)      | 33% | 82%  | 98% | 100% | n.d. | n.d. | n.d. | n.d. | n.d. |
|                                          | Y(HMF)      | 15% | 45%  | 42% | 25%  | n.d. | n.d. | n.d. | n.d. | n.d. |
|                                          | Y(LA)       | 0%  | 11%  | 24% | 40%  | n.d. | n.d. | n.d. | n.d. | n.d. |
|                                          | S(HMF)      | 46% | 55%  | 42% | 25%  | n.d. | n.d. | n.d. | n.d. | n.d. |
|                                          | S(HMF+LA)   | 47% | 68%  | 67% | 65%  | n.d. | n.d. | n.d. | n.d. | n.d. |
| H <sub>2</sub> SO <sub>4</sub><br>pH.1.1 | C(Frc)      | 24% | n.d. | 73% | n.d. | 91%  | 100% | n.d. | n.d. | n.d. |
|                                          | Y(HMF)      | 12% | n.d. | 37% | n.d. | 32%  | 16%  | n.d. | n.d. | n.d. |
|                                          | Y(LA)       | 1%  | n.d. | 10% | n.d. | 29%  | 51%  | n.d. | n.d. | n.d. |
|                                          | S(HMF)      | 53% | n.d. | 50% | n.d. | 36%  | 16%  | n.d. | n.d. | n.d. |
|                                          | S(HMF+LA)   | 55% | n.d. | 64% | n.d. | 68%  | 68%  | n.d. | n.d. | n.d. |
| HCl<br>pH.1.2                            | C(Frc)      | 33% | 57%  | 73% | 86%  | n.d. | n.d. | n.d. | n.d. | n.d. |
|                                          | Y(HMF)      | 20% | 37%  | 41% | 35%  | n.d. | n.d. | n.d. | n.d. | n.d. |
|                                          | Y(LA)       | 1%  | 10%  | 18% | 35%  | n.d. | n.d. | n.d. | n.d. | n.d. |
|                                          | S(HMF)      | 61% | 66%  | 56% | 40%  | n.d. | n.d. | n.d. | n.d. | n.d. |
|                                          | S(HMF+LA)   | 65% | 82%  | 80% | 81%  | n.d. | n.d. | n.d. | n.d. | n.d. |

|                                          |           |     |      |      |      |      |      |      |      |                   |
|------------------------------------------|-----------|-----|------|------|------|------|------|------|------|-------------------|
| HNO <sub>3</sub><br>pH.1.2               | C(Frc)    | 43% | n.d. | 81%  | n.d. | 91%  | 97%  | n.d. | n.d. | n.d.              |
|                                          | Y(HMF)    | 26% | n.d. | 40%  | n.d. | 22%  | 6%   | n.d. | n.d. | n.d.              |
|                                          | Y(LA)     | 3%  | n.d. | 22%  | n.d. | 51%  | 68%  | n.d. | n.d. | n.d.              |
|                                          | S(HMF)    | 60% | n.d. | 50%  | n.d. | 24%  | 6%   | n.d. | n.d. | n.d.              |
|                                          | S(HMF+LA) | 67% | n.d. | 77%  | n.d. | 80%  | 77%  | n.d. | n.d. | n.d.              |
| Citric acid<br>pH.1.4                    | C(Frc)    | 8%  | n.d. | 40%  | n.d. | 86%  | 100% | n.d. | n.d. | n.d.              |
|                                          | Y(HMF)    | 5%  | n.d. | 30%  | n.d. | 42%  | 30%  | n.d. | n.d. | n.d.              |
|                                          | Y(LA)     | 0%  | n.d. | 2%   | n.d. | 11%  | 27%  | n.d. | n.d. | n.d.              |
|                                          | S(HMF)    | 63% | n.d. | 75%  | n.d. | 49%  | 30%  | n.d. | n.d. | n.d.              |
|                                          | S(HMF+LA) | 63% | n.d. | 80%  | n.d. | 62%  | 57%  | n.d. | n.d. | n.d.              |
| Glycolic acid<br>pH.1.8                  | C(Frc)    | 6%  | n.d. | 22%  | n.d. | 44%  | 71%  | n.d. | n.d. | n.d.              |
|                                          | Y(HMF)    | 1%  | n.d. | 9%   | n.d. | 25%  | 37%  | n.d. | n.d. | n.d.              |
|                                          | Y(LA)     | 0%  | n.d. | 0%   | n.d. | 1%   | 3%   | n.d. | n.d. | n.d.              |
|                                          | S(HMF)    | 12% | n.d. | 42%  | n.d. | 57%  | 53%  | n.d. | n.d. | n.d.              |
|                                          | S(HMF+LA) | 12% | n.d. | 42%  | n.d. | 59%  | 57%  | n.d. | n.d. | n.d.              |
| Citric acid<br>pH.2.0                    | C(Frc)    | 15% | n.d. | 29%  | n.d. | 46%  | 62%  | 81%  | 90%  | 98%               |
|                                          | Y(HMF)    | 7%  | n.d. | 16%  | n.d. | 27%  | 40%  | 42%  | 42%  | 37%               |
|                                          | Y(LA)     | 0%  | n.d. | 0%   | n.d. | 1%   | 5%   | 9%   | 12%  | 19%               |
|                                          | S(HMF)    | 47% | n.d. | 56%  | n.d. | 60%  | 64%  | 52%  | 47%  | 38%               |
|                                          | S(HMF+LA) | 47% | n.d. | 57%  | n.d. | 63%  | 72%  | 62%  | 60%  | 57%               |
| H <sub>3</sub> PO <sub>4</sub><br>pH.2.0 | C(Frc)    | 7%  | n.d. | 17%  | n.d. | 32%  | 48%  | 62%  | 74%  | 88%               |
|                                          | Y(HMF)    | 1%  | n.d. | 7%   | n.d. | 16%  | 29%  | 39%  | 43%  | 43%               |
|                                          | Y(LA)     | 0%  | n.d. | 0%   | n.d. | 0%   | 2%   | 5%   | 8%   | 15%               |
|                                          | S(HMF)    | 17% | n.d. | 44%  | n.d. | 50%  | 61%  | 63%  | 58%  | 49%               |
|                                          | S(HMF+LA) | 17% | n.d. | 44%  | n.d. | 50%  | 65%  | 71%  | 69%  | 66%               |
| Acetic acid<br>pH.2.0                    | C(Frc)    | 19% | n.d. | n.d. | n.d. | n.d. | 79%  | n.d. | 96%  | 100% <sup>a</sup> |
|                                          | Y(HMF)    | 0%  | n.d. | n.d. | n.d. | n.d. | 37%  | n.d. | 45%  | 19% <sup>a</sup>  |
|                                          | Y(LA)     | 0%  | n.d. | n.d. | n.d. | n.d. | 0%   | n.d. | 2%   | 7% <sup>a</sup>   |
|                                          | S(HMF)    | 0%  | n.d. | n.d. | n.d. | n.d. | 47%  | n.d. | 47%  | 19% <sup>a</sup>  |
|                                          | S(HMF+LA) | 0%  | n.d. | n.d. | n.d. | n.d. | 48%  | n.d. | 49%  | 26% <sup>a</sup>  |

## Reaction rate constants

Table 3: reaction rate constants determined at 140°C

|                                       | k <sub>1</sub> (10 <sup>-3</sup> min <sup>-1</sup> ) | k <sub>2</sub> (10 <sup>-3</sup> min <sup>-1</sup> ) | k <sub>3</sub> (10 <sup>-3</sup> min <sup>-1</sup> ) | k <sub>4</sub> (10 <sup>-3</sup> min <sup>-1</sup> ) |
|---------------------------------------|------------------------------------------------------|------------------------------------------------------|------------------------------------------------------|------------------------------------------------------|
| H <sub>3</sub> PO <sub>4</sub> pH.1.0 | 102,00                                               | 30,00                                                | 24,00                                                | 0,00                                                 |
| H <sub>2</sub> SO <sub>4</sub> pH.1.1 | 33,50                                                | 14,50                                                | 13,30                                                | 0,00                                                 |
| HCl pH.1.2                            | 43,60                                                | 23,50                                                | 0,00                                                 | 3,50                                                 |
| HNO <sub>3</sub> pH.1.2               | 45,32                                                | 24,16                                                | 0,56                                                 | 2,99                                                 |
| Citric acid pH.1.4                    | 20,80                                                | 6,00                                                 | 5,70                                                 | 5,70                                                 |
| Glycolic acid pH.1.8                  | 6,00                                                 | 0,90                                                 | 3,20                                                 | 0,80                                                 |
| Citric acid pH.2.0                    | 7,20                                                 | 1,50                                                 | 0,70                                                 | 2,30                                                 |
| H <sub>3</sub> PO <sub>4</sub> pH.2.0 | 3,92                                                 | 1,35                                                 | 1,38                                                 | 0,06                                                 |
| Acetic acid pH.2.0                    | 7,60                                                 | 0,17                                                 | 3,80                                                 | 0,70                                                 |
